# Supplementary material for: Homozygous frame shift variant in ATP7B exon 1 leads to bypass of nonsense-mediated mRNA decay and to a protein capable of copper export
Source: Springer Nature journal article supplement (doi:10.1038/s41431-019-0345-1), 2019-02-05
Supplement: MOESM2 [file 41431_2019_345_MOESM2_ESM.pdf › 41431_2019_345_MOESM2_ESM.pdf]

## Supplementary Results

### Homozygous frame shift variant in *ATP7B* exon 1 leads to bypass of nonsense-mediated mRNA decay and to a protein capable of copper export

Amelie Stalke<sup>1</sup>, Eva-Doreen Pfister<sup>2</sup>, Ulrich Baumann<sup>2</sup>, Marlies Eilers<sup>1</sup>, Vera Schäffer<sup>1</sup>, Thomas Illig<sup>1,3</sup>, Bernd Auber<sup>1</sup>, Brigitte Schlegelberger<sup>1</sup>, Renate Brackmann<sup>4</sup>, Holger Prokisch<sup>5,6</sup>, Simon Krooss<sup>7</sup>, Jens Bohne<sup>7</sup>, Britta Skawran<sup>1</sup>

<sup>1</sup>Department of Human Genetics, Hannover Medical School, Hannover, Germany

<sup>2</sup>Department of Kidney, Liver and Metabolic Disease, Division of Pediatric Gastroenterology and Hepatology, Hannover Medical School, Hannover, Germany

<sup>3</sup>Hannover Unified Biobank, Hannover Medical School, Hannover, Germany

<sup>4</sup>Department of Child and Adolescent Medicine, Klinikum Herford, Herford, Germany.

<sup>5</sup>Institute of Human Genetics, Helmholtz Center Munich, Neuherberg, Germany

<sup>6</sup>Institute of Human Genetics, Technical University Munich, Munich, Germany

<sup>7</sup>Department of Virology, Hannover Medical School, Hannover, Germany

**Corresponding author:**

Dr. Amelie Stalke, email: Stalke.Amelie@mh-hannover.de

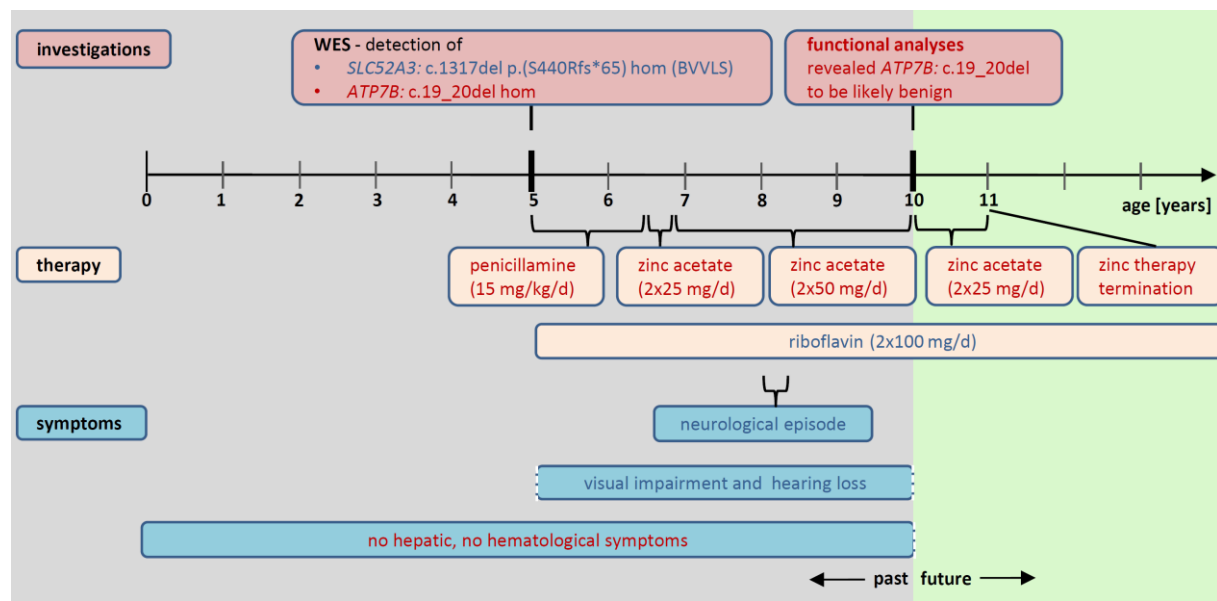

**Fig. S1 Timeline of performed investigations, initiated therapies and symptoms of the index patient as well as planned therapy adjustment.** Red font illustrates information in conjunction with the *ATP7B* variant c.19\_20del, blue font illustrates information in conjunction with the *SLC52A3* variant c.1317del; BVVLS: Brown-Vialetto-Van-Laere syndrome, hom: homozygous.

## Full size pictures of northern and western blots

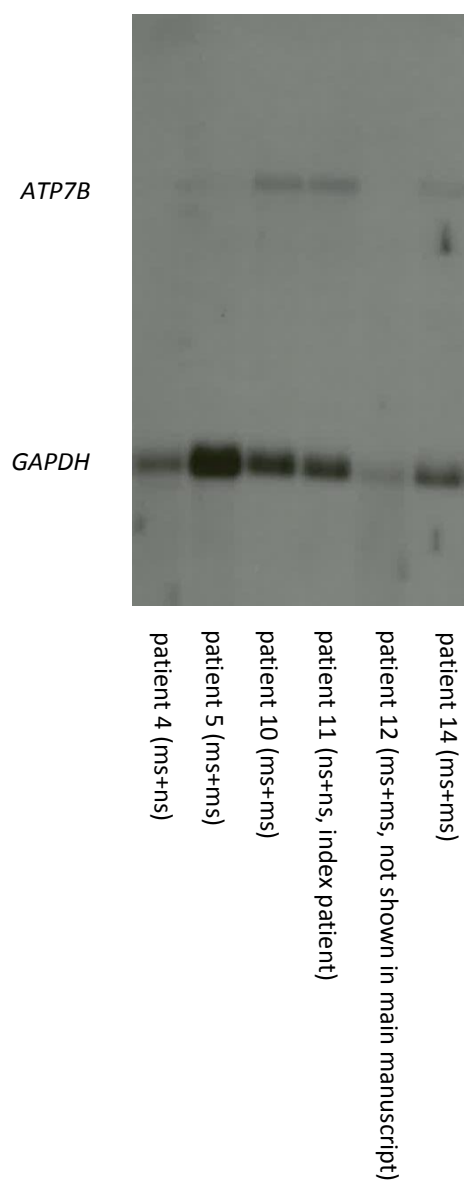

**Fig. S2 Full size northern blot of RNA from liver tissue of exemplarily chosen WD patients** (see Tab. S1); ms: missense variant, ns: nonsense or frameshift variant.

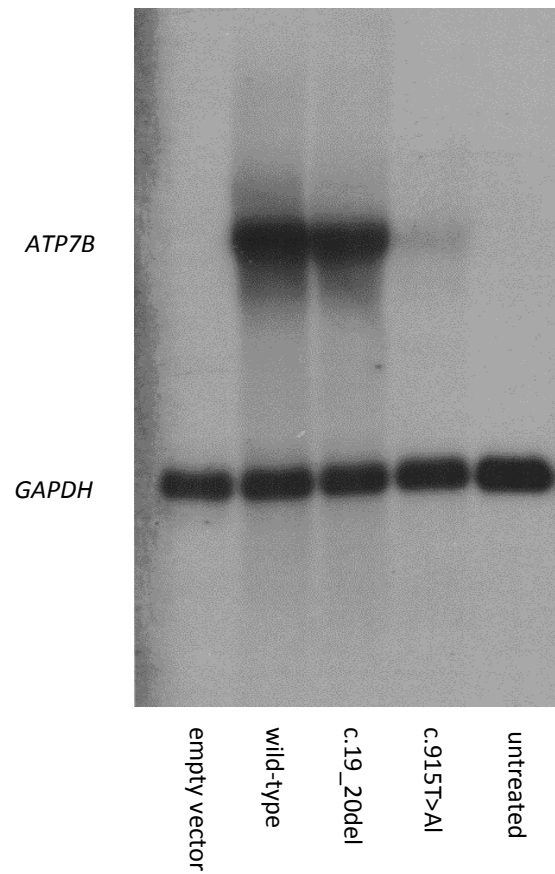

**Fig. S3 Full size northern blot of RNA from HEK293T cells transfected with pcDNA3 empty vector, or *ATP7B* expression vectors pcDNA3\_wild-type, pcDNA3\_c.19\_20del, pcDNA3\_915T>A for 48 h or left untreated.**

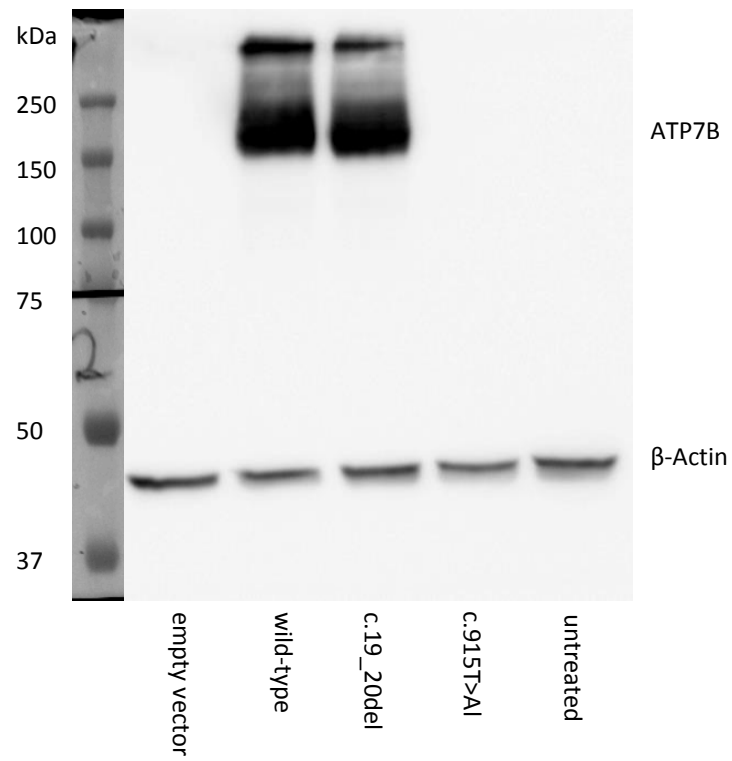

**Fig. S4** Full size western blot of protein from HEK293T cells transfected with pcDNA3 empty vector or *ATP7B* expression vectors pcDNA3\_wild-type, pcDNA3\_c.19\_20del, pcDNA3\_915T>A for 48 h or left untreated.

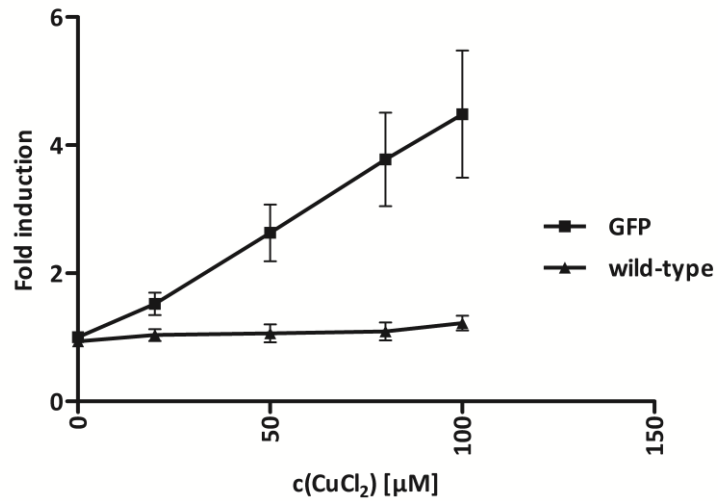

**Fig. S5 Copper concentration-dependent luciferase induction under co-expression of pcDNA3\_GFP or pcDNA3\_wild-type.** HEK293T cells were co-transfected with pGL3\_4MRE, pRL-TK and pcDNA3\_GFP or *ATP7B* expression vector pcDNA3\_wild-type. After 24 h cells were treated with 0, 20, 50, 80 or 100 μM CuCl<sub>2</sub>. Luciferase activity was measured after additional 24 h and normalized to renilla luciferase activity. Values were corrected for pcDNA3\_GFP under basal copper condition (0 μM). Error bars show standard deviation.

**Tab. S1 *ATP7B* variants of investigated Wilson disease patients and corresponding relative expression values in *ATP7B* qRT-PCR.** Nomenclature according to HGVS (www.hgvs.org) for NCBI reference transcript NM\_000053.3, consecutive exon numbering with c.1 as first nucleotide of exon 1.

| patient | Detected <i>ATP7B</i> variants                                                     | Relative <i>ATP7B</i> expression in qRT-PCR |
|---------|------------------------------------------------------------------------------------|---------------------------------------------|
| 1       | Ex8: c.2336G>A p.(W779*) heterozygous<br>Ex14: c.3207C>A p.(H1069Q) heterozygous   | 1,68                                        |
| 2       | Ex8: c.2222dupA p.(Y741*) heterozygous<br>Ex18: c.3890T>A p.(V1297D) heterozygous  | 2,26                                        |
| 3       | Ex14: c.3207C>A p.(H1069Q) homozygous                                              | 2,07                                        |
| 4       | Ex2: c.915T>A p.(C305*) heterozygous<br>Ex14: c.3207C>A p.(H1069Q) heterozygous    | 1,39                                        |
| 5       | Ex8: c.2305A>G p.(M769V) homozygous                                                | 1,17                                        |
| 6       | Ex18: c.3809A>G p.(N1270S) homozygous                                              | 2,78                                        |
| 7       | Ex14: c.3207C>A p.(H1069Q) heterozygous<br>Ex20: c.4054C>T p.(Q1352*) heterozygous | 1,54                                        |
| 8       | Ex16: c.3424C>T p.(Q1142*) homozygous                                              | 0,51                                        |
| 9       | Ex10: c.2532delA p.(V845Sfs*28) homozygous                                         | 0,56                                        |
| 10      | Ex18: c.3809A>G p.(N1270S) homozygous                                              | 6,99                                        |
| 11      | Ex1: c.19_20delCA p.(Q7Dfs*14) homozygous                                          | 6,71                                        |
| 12      | Ex14: c.3207C>A p.(H1069Q) heterozygous<br>Ex7: c.2108G>A p.(C703Y) heterozygous   | 1,79                                        |
| 13      | Ex18: c.3809A>G p.(N1270S) homozygous                                              | 6,69                                        |
| 14      | Ex18: c.3809A>G p.(N1270S) homozygous                                              | 4,24                                        |
| 15      | Ex14: c.3207C>A p.(H1069Q) homozygous                                              | 1,91                                        |

**Tab. S2** Potential new start codons with amino acid localization and corresponding protein domain

|                     |          | Downstream ATG in exon 2 |        |        |        |        |        |        |        |        |          |
|---------------------|----------|--------------------------|--------|--------|--------|--------|--------|--------|--------|--------|----------|
| ATG                 | original | 1                        | 2      | 3      | 4      | 5      | 6      | 7      | 8      | 9      | 10       |
| kDa                 | 157.29   | 153.66                   | 150.17 | 147.76 | 144.53 | 141.08 | 135.22 | 128.55 | 117.95 | 116.73 | 112.49   |
| AA position         | 1        | 33                       | 67     | 89     | 119    | 152    | 204    | 266    | 368    | 380    | 420      |
| Domain <sub>1</sub> | /        | /                        | MBD1   | MBD1   | MBD1   | MBD2   | MBD2   | MBD3   | MBD4   | MBD4   | Linker 4 |

MBD: metal-binding domain, AA: amino acid

## Supplementary Results - References

1. Arioiz C, Li Y, Wittung-Stafshede P: The six metal binding domains in human copper transporter, ATP7B: molecular biophysics and disease-causing mutations. *Biometals* 2017; **30**: 823-840.
